# Supplementary material for: Assessment of potential for viral contamination of user and environment via aerosols generated during hand drying: A pilot study
Source: Frontiers journal article supplement (doi:10.3389/fpubh.2022.1010802), 2022-10-25
Supplement: Image_1.pdf [file Image_1.pdf]

## Supplementary Material

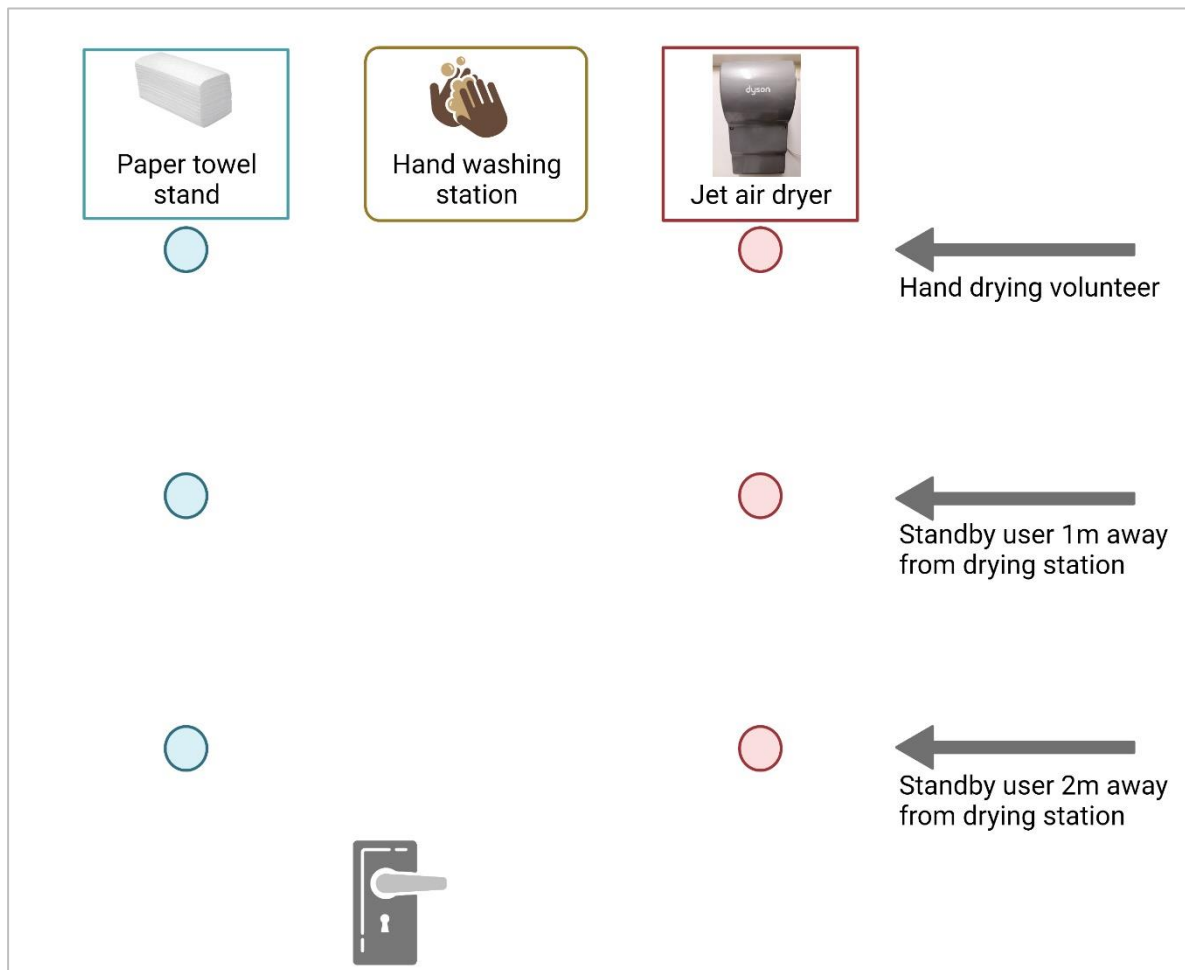

**Supplementary Figure 1.** Schematics of the room layout where hand drying experiments were performed. Figure created with Biorender.com.
